# Supplementary material for: Suggesting Indicators of Age-Friendly City: Social Participation and Happiness, an Ecological Study from the JAGES
Source: MDPI journal article supplement (doi:10.3390/ijerph19095096), 2022-04-22
Supplement: s1 [file s1]

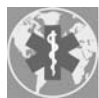

## Supplementary Materials

**Table S1.** The results of the linear mixed-effects model evaluation of the relationship between social participation and happiness scores of 7 or higher at the municipal level.

| Variables        | Crude |        |      |         | Model 1 |        |       |         | Model 2 |        |      |         |
|------------------|-------|--------|------|---------|---------|--------|-------|---------|---------|--------|------|---------|
|                  | B     | 95% CI |      | p       | B       | 95% CI |       | p       | B       | 95% CI |      | p       |
| Volunteering (%) | 0.65  | 0.49   | 0.82 | < 0.001 | 0.24    | 0.10   | 0.38  | < 0.001 | 0.11    | 0.00   | 0.23 | 0.052   |
| Sports (%)       | 0.50  | 0.44   | 0.56 | < 0.001 | 0.31    | 0.23   | 0.39  | < 0.001 | 0.16    | 0.09   | 0.24 | < 0.001 |
| Hobbies (%)      | 0.51  | 0.45   | 0.56 | < 0.001 | 0.36    | 0.27   | 0.45  | < 0.001 | 0.20    | 0.12   | 0.28 | < 0.001 |
| Seniors (%)      | −0.04 | −0.17  | 0.09 | 0.567   | 0.32    | 0.22   | 0.42  | < 0.001 | 0.20    | 0.12   | 0.28 | < 0.001 |
| Neighborhood (%) | −0.06 | −0.20  | 0.08 | 0.411   | −0.11   | −0.21  | −0.01 | 0.029   | −0.07   | −0.16  | 0.01 | 0.072   |
| Learning (%)     | 0.82  | 0.68   | 0.96 | < 0.001 | 0.42    | 0.25   | 0.60  | < 0.001 | 0.20    | 0.05   | 0.35 | 0.011   |
| Skills (%)       | 1.31  | 1.09   | 1.54 | < 0.001 | 0.50    | 0.24   | 0.75  | < 0.001 | 0.25    | 0.04   | 0.46 | 0.020   |

B: Unstandardized coefficients. CI: Confidence interval. All of the factors were adjusted for age using the direct methods. The dependent variable was happiness with a score of 7 points or higher. The data was an iterative cross-sectional design that consisted of two levels; i.e., Level 1 municipal level aggregates were nested within Level 2 survey years. Model 1: Crude model + low equivalent income, low education, living alone at the municipal level, and population density of habitable land. Model 2: Model 1 + self-reported medical illness, poor self-rated health, and depression.

**Table S2.** The results of the linear mixed-effects model evaluation of the relationship between social participation and happiness scores of less than 5 at the municipal level.

| Variables        | Crude |        |       |         | Model 1 |        |       |         | Model 2 |        |       |         |
|------------------|-------|--------|-------|---------|---------|--------|-------|---------|---------|--------|-------|---------|
|                  | B     | 95% CI |       | p       | B       | 95% CI |       | p       | B       | 95% CI |       | p       |
| Volunteering (%) | −0.63 | −0.77  | −0.48 | < 0.001 | −0.23   | −0.34  | −0.11 | < 0.001 | −0.13   | −0.23  | −0.03 | 0.011   |
| Sports (%)       | −0.47 | −0.52  | −0.42 | < 0.001 | −0.29   | −0.35  | −0.22 | < 0.001 | −0.18   | −0.24  | −0.11 | < 0.001 |
| Hobbies (%)      | −0.48 | −0.52  | −0.43 | < 0.001 | −0.34   | −0.41  | −0.27 | < 0.001 | −0.22   | −0.29  | −0.15 | < 0.001 |
| Seniors (%)      | 0.09  | −0.03  | 0.20  | 0.139   | −0.24   | −0.32  | −0.16 | < 0.001 | −0.14   | −0.22  | −0.07 | < 0.001 |
| Neighborhood (%) | 0.03  | −0.10  | 0.15  | 0.697   | 0.09    | 0.00   | 0.17  | 0.045   | 0.06    | −0.01  | 0.13  | 0.117   |
| Learning (%)     | −0.76 | −0.88  | −0.64 | < 0.001 | −0.35   | −0.49  | −0.20 | < 0.001 | −0.16   | −0.29  | −0.03 | 0.016   |
| Skills (%)       | −1.23 | −1.43  | −1.04 | < 0.001 | −0.43   | −0.65  | −0.22 | < 0.001 | −0.24   | −0.42  | −0.06 | 0.010   |

B: Unstandardized coefficients. CI: Confidence interval. All of the factors were adjusted for age using the direct methods. The dependent variable was happiness with a score of 5 points or less. The data was an iterative cross-sectional design that consisted of two levels; i.e., Level 1 municipal level aggregates were nested within Level 2 survey years. Model 1: Crude model + low equivalent income, low education, living alone at the municipal level, and population density of habitable land. Model 2: Model 1 + self-reported medical illness, poor self-rated health, and depression.
